# TransmiR: a transcription factor–microRNA regulation database

Juan Wang<sup>1,2</sup>, Ming Lu<sup>1,2</sup>, Chengxiang Qiu<sup>1,2</sup> and Qinghua Cui<sup>1,2,\*</sup>

<sup>1</sup>Department of Biomedical Informatics, Peking University School of Basic Medical Sciences and

<sup>2</sup>MOE Key Laboratory of Molecular Cardiology, Peking University, Beijing, 100191, China

Received June 25, 2009; Revised September 13, 2009; Accepted September 14, 2009

## ABSTRACT

MicroRNAs (miRNAs) regulate gene expression at the posttranscriptional level and are therefore important cellular components. As is true for protein-coding genes, the transcription of miRNAs is regulated by transcription factors (TFs), an important class of gene regulators that act at the transcriptional level. The correct regulation of miRNAs by TFs is critical, and increasing evidence indicates that aberrant regulation of miRNAs by TFs can cause phenotypic variations and diseases. Therefore, a TF–miRNA regulation database would be helpful for understanding the mechanisms by which TFs regulate miRNAs and understanding their contribution to diseases. In this study, we manually surveyed approximately 5000 reports in the literature and identified 243 TF–miRNA regulatory relationships, which were supported experimentally from 86 publications. We used these data to build a TF–miRNA regulatory database (TransmiR, <http://cmbi.bjmu.edu.cn/transmir>), which contains 82 TFs and 100 miRNAs with 243 regulatory pairs between TFs and miRNAs. In addition, we included references to the published literature (PubMed ID) information about the organism in which the relationship was found, whether the TFs and miRNAs are involved with tumors, miRNA function annotation and miRNA-associated disease annotation. TransmiR provides a user-friendly interface by which interested parties can easily retrieve TF–miRNA regulatory pairs by searching for either a miRNA or a TF.

## INTRODUCTION

MicroRNAs (miRNAs) are endogenous small (~22 nt) noncoding regulatory RNAs that typically function as

negative regulators of mRNA expression at the posttranscriptional level. They act by binding to the 3'-untranslated regions (3'-UTRs) of target mRNAs through base pairing to complementary sequences. This binding results in cleavage or translation inhibition of the target mRNAs (1–3). miRNAs play critical roles in many essential biological processes, such as proliferation (4,5), metabolism (6,7), differentiation (8), development (9,10), apoptosis (7,11,12) and cellular signaling (13). Because of their biological importance, the dysfunction of specific miRNAs is associated with a variety of diseases, such as cancer and cardiovascular diseases (8,14,15).

No genes are completely independent but rather they interact with other genes. In case of miRNAs, they usually affect downstream molecules by regulating the expression of target genes. Estimates suggest that ~1–4% of genes in the human genome encode miRNAs and that a single miRNA can regulate as many as 200 mRNAs (8). Furthermore, the expression of miRNAs can be activated or repressed by transcription factors (TFs), which therefore can serve as upstream regulators of miRNA. In recent years, many researchers have attempted to understand how miRNAs act to regulate target genes and what their roles are in various diseases. However, the study of miRNA regulation by TFs (TF–miRNA regulation) has been relatively limited. We reported previously that miRNAs and TFs may cooperate to tune gene expression (16). In addition, miRNAs and TFs can form feedback or feed-forward loops, which play critical roles in various biological processes. For example, Yamakuchi and Lowenstein (17) reported a feedback loop in which p53 induces expression of miR-34a, which in turn suppresses the expression of SIRT1 and thus increases p53 activity. Increasing evidence suggests that aberrant regulation of miRNAs by TFs can cause diseases (18). Therefore, TF–miRNA regulation is one of the most important aspects of the study of both miRNAs and TFs and is attracting the interest of increasing numbers of researchers. For this reason, a high-quality TF–miRNA regulation database will be of great help in the study of both the regulation of miRNAs

\*To whom correspondence should be addressed. Tel: +8610 82801585; Fax: +8610 82801001; Email: [cuiqinghua@hsc.pku.edu.cn](mailto:cuiqinghua@hsc.pku.edu.cn)

The authors wish it to be known that, in their opinion, the first three authors should be regarded as joint First Authors.

© The Author(s) 2009. Published by Oxford University Press.

This is an Open Access article distributed under the terms of the Creative Commons Attribution Non-Commercial License (<http://creativecommons.org/licenses/by-nc/2.5/uk/>) which permits unrestricted non-commercial use, distribution, and reproduction in any medium, provided the original work is properly cited.



**Table 1.** Association between conservation and the degree of miRNAs

| miRNAs                               | Number of miRNAs in the G1 group | Number of miRNAs not in the G1 group | P-value* |
|--------------------------------------|----------------------------------|--------------------------------------|----------|
| High-degree group (degree $\geq 3$ ) | 14                               | 15                                   | 0.02     |
| Low-degree group (degree $< 3$ )     | 9                                | 33                                   |          |

\*P-value was calculated using Fisher's exact test.

component of the network represented 67.8% of the original network nodes, which suggests that many TFs/miRNAs interact with other miRNAs/TFs. A single miRNA could be regulated by different TFs and one TF could regulate multiple miRNAs. These findings indicate that the regulatory relationships between TFs and miRNAs are complex. Both the TF and the miRNA nodes had skewed degree (the number of connections to a node) distribution. These skewed distributions suggest that most TFs regulate just a few miRNAs and, in addition, that most miRNAs are regulated by a small number of TFs. However, it also means that some hub TFs and miRNAs showed a very high number of connections, which suggests that they may play essential roles in TF-miRNA regulation. For example, *MYC* regulated 26 miRNAs, and miR-20a was regulated by seven TFs. Degree is a measure of node centrality in a network. Those nodes that interact with a greater number of nodes than others are normally more important in cellular functioning and could represent factors that would be more highly conserved in evolution (20). Previously, we revealed a correlation between conservation and the degree of a protein (21). However, no previous research has shown whether this pattern exists in TF-miRNA network. In order to address this issue, we investigated the correlation between conservation and degree for the miRNAs. We evaluated miRNA conservation using data on miRNA families and the method presented by Zhang *et al.* (22). Human miRNAs were classified into five groups according to their level of conservation: miRNAs that were present only in humans (G5), conserved in primates (G4), conserved in mammals (G3), conserved in vertebrates (G2) and those that were conserved in other more distant species (G1, the most conserved group). We classified the miRNAs in the network into two groups according to their degree: the high-degree group (degree  $\geq 3$ ) and the low-degree group (degree  $< 3$ ). We evaluated the level of conservation for the miRNAs in these two groups. As expected, we found that the miRNAs in the high-degree groups were more conserved (i.e. a greater number were in G1,  $P = 0.02$ , Fisher's exact test) than those in the low-degree group (Table 1). This suggests that miRNAs that are regulated by a large number of TFs tend to be highly conserved during evolution.

## FUTURE EXTENSIONS

The TransmiR database represents the first step in this project and further extensions should be developed.

As we described above, feedback/feed-forward loops represent two critical local interactions between TFs and miRNAs. Therefore, we plan to curate feedback/feed-forward loops between TFs and miRNAs and integrate them into TransmiR. Furthermore, we will also incorporate miRNA target data that is supported experimentally. In addition, we will classify both TFs and miRNAs into more detailed clusters according to their associations with various diseases, such as cancer or cardiovascular diseases. Finally, we will include additional annotations, such as expression patterns (23), and conservation during evolution will be included in future updates. We plan to continuously update TransmiR.

## ACKNOWLEDGEMENTS

We thank Drs Edmund F. and Rhoda E. Perozzi for English editing assistance.

## FUNDING

State Basic Research Development Program of China (No. 2007CB512100 partially). Funding for open access charge: The State Basic Research Development Program of China (No. 2007CB512100).

*Conflict of interest statement.* None declared.

## REFERENCES

- Ambros, V. (2004) The functions of animal microRNAs. *Nature*, **431**, 350–355.
- Bartel, D.P. (2004) MicroRNAs: genomics, biogenesis, mechanism, and function. *Cell*, **116**, 281–297.
- Meister, G. and Tuschl, T. (2004) Mechanisms of gene silencing by double-stranded RNA. *Nature*, **431**, 343–349.
- Chen, J.F., Mandel, E.M., Thomson, J.M., Wu, Q., Callis, T.E., Hammond, S.M., Conlon, F.L. and Wang, D.Z. (2006) The role of microRNA-1 and microRNA-133 in skeletal muscle proliferation and differentiation. *Nat. Genet.*, **38**, 228–233.
- Zhao, Y., Samal, E. and Srivastava, D. (2005) Serum response factor regulates a muscle-specific microRNA that targets Hand2 during cardiogenesis. *Nature*, **436**, 214–220.
- Poy, M.N., Eliasson, L., Krutzfeldt, J., Kuwajima, S., Ma, X., Macdonald, P.E., Pfeffer, S., Tuschl, T., Rajewsky, N., Rorsman, P. *et al.* (2004) A pancreatic islet-specific microRNA regulates insulin secretion. *Nature*, **432**, 226–230.
- Xu, P., Vernooij, S.Y., Guo, M. and Hay, B.A. (2003) The *Drosophila* microRNA Mir-14 suppresses cell death and is required for normal fat metabolism. *Curr. Biol.*, **13**, 790–795.
- Esquela-Kerscher, A. and Slack, F.J. (2006) Oncomirs – microRNAs with a role in cancer. *Nat. Rev. Cancer*, **6**, 259–269.
- Jin, P., Zarnescu, D.C., Ceman, S., Nakamoto, M., Mowrey, J., Jongens, T.A., Nelson, D.L., Moses, K. and Warren, S.T. (2004) Biochemical and genetic interaction between the fragile X mental retardation protein and the microRNA pathway. *Nat. Neurosci.*, **7**, 113–117.
- Zhao, Y., Ransom, J.F., Li, A., Vedantham, V., von Drehle, M., Muth, A.N., Tsuchihashi, T., McManus, M.T., Schwartz, R.J. and Srivastava, D. (2007) Dysregulation of cardiogenesis, cardiac conduction, and cell cycle in mice lacking miRNA-1-2. *Cell*, **129**, 303–317.
- Xu, C., Lu, Y., Pan, Z., Chu, W., Luo, X., Lin, H., Xiao, J., Shan, H., Wang, Z. and Yang, B. (2007) The muscle-specific microRNAs miR-1 and miR-133 produce opposing effects on apoptosis by targeting HSP60, HSP70 and caspase-9 in cardiomyocytes. *J. Cell Sci.*, **120**, 3045–3052.

12. Xu,P., Guo,M. and Hay,B.A. (2004) MicroRNAs and the regulation of cell death. *Trends Genet.*, **20**, 617–624.
13. Cui,Q., Yu,Z., Purisima,E.O. and Wang,E. (2006) Principles of microRNA regulation of a human cellular signaling network. *Mol. Syst. Biol.*, **2**, 46.
14. Latronico,M.V., Catalucci,D. and Condorelli,G. (2007) Emerging role of microRNAs in cardiovascular biology. *Circ. Res.*, **101**, 1225–1236.
15. Lu,M., Zhang,Q., Deng,M., Miao,J., Guo,Y., Gao,W. and Cui,Q. (2008) An analysis of human microRNA and disease associations. *PLoS ONE*, **3**, e3420.
16. Cui,Q., Yu,Z., Pan,Y., Purisima,E.O. and Wang,E. (2007) MicroRNAs preferentially target the genes with high transcriptional regulation complexity. *Biochem. Biophys. Res. Commun.*, **352**, 733–738.
17. Yamakuchi,M. and Lowenstein,C.J. (2009) MiR-34, SIRT1 and p53: the feedback loop. *Cell Cycle*, **8**, 712–715.
18. Mraz,M., Pospisilova,S., Malinova,K., Slapak,I. and Mayer,J. (2009) MicroRNAs in chronic lymphocytic leukemia pathogenesis and disease subtypes. *Leuk. Lymphoma*, **50**, 506–509.
19. Taccioli,C., Fabbri,E., Visone,R., Volinia,S., Calin,G.A., Fong,L.Y., Gambari,R., Bottoni,A., Acunzo,M., Hagan,J. *et al.* (2009) UCbase & miRfunc: a database of ultraconserved sequences and microRNA function. *Nucleic Acids Res.*, **37**, D41–D48.
20. Pal,C., Papp,B. and Lercher,M.J. (2006) An integrated view of protein evolution. *Nat. Rev. Genet.*, **7**, 337–348.
21. Cui,Q., Purisima,E.O. and Wang,E. (2009) Protein evolution on a human signaling network. *BMC Syst. Biol.*, **3**, 21.
22. Zhang,Q., Lu,M. and Cui,Q. (2008) *SNP analysis reveals an evolutionary acceleration of the human-specific microRNAs*, *Nature Precedings*. <http://hdl.handle.net/10101/npre.2008.2127.1>.
23. Betel,D., Wilson,M., Gabow,A., Marks,D.S. and Sander,C. (2008) The microRNA.org resource: targets and expression. *Nucleic Acids Res.*, **36**, D149–D153.
